# Supplementary material
Source: PubMed Central journal article supplement (PMC5070805)
Supplement: NIHMS822248-supplement-Supplement.pdf [file NIHMS822248-supplement-Supplement.pdf]

## Supporting Information

*Title:*

**Discovery of Novel Potent and Selective Agonists at the Melanocortin-3 Receptor**

*Authors:*

Alfonso Carotenuto, Francesco Merlino, Minying Cai, Diego Brancaccio, Ali Munaim Yousif,  
Ettore Novellino, Victor J. Hruby, Paolo Grieco

*Contents of SI*

Analytical data of the synthesized peptides (Table S1). NMR Spectroscopy Details (page S2). NMR data of the analyzed peptides (Tables S2-S6). Upper limit constraints (Table S7). Statistical analysis of predicted I-TASSER structures. (Table S8). Docking statistics and energy terms (Table S9). UHPLC traces and HRMS spectra (Figures S1-S4). Noesy spectra (Figures S5-S7). Chemical Shift Index (Figure S8).

**Table S1.** Analytical Data for the Studied Peptides

| Peptide           | Structure                                                 | HPLC <sup>a</sup> | HRMS (M+H) |           |
|-------------------|-----------------------------------------------------------|-------------------|------------|-----------|
|                   |                                                           | <i>k'</i>         | Found      | Calcd     |
| <b>1 (PG-989)</b> | Ac-Nle-c[Asp-Pro-Pro-DPhe-Arg-Trp-Lys]-NH <sub>2</sub>    | 4.76              | 1081.5923  | 1081.5947 |
| <b>2 (PG-990)</b> | Ac-Nle-c[Asp-Pro-Pro-DNal(2)-Arg-Trp-Lys]-NH <sub>2</sub> | 5.16              | 1131.6068  | 1131.6104 |
| <b>3 (PG-991)</b> | Ac-Nle-c[Asp-Trp-Pro-DPhe-Arg-Trp-Lys]-NH <sub>2</sub>    | 5.27              | 1170.6172  | 1170.6213 |
| <b>4 (PG-992)</b> | Ac-Nle-c[Asp-Trp-Pro-DNal(2)-Arg-Trp-Lys]-NH <sub>2</sub> | 5.66              | 1220.6338  | 1220.6369 |

<sup>a</sup> $k' = [(\text{peptide retention time} - \text{solvent retention time}) / \text{solvent retention time}]$ . Peptides **1-4** were purified by RP-HPLC (Shimadzu Preparative Liquid Chromatograph LC-8A) on C18-bonded silica column (Phenomenex, Jupiter 4  $\mu\text{m}$  Proteo 90 $\text{\AA}$ , 10x250 mm), by eluting from 10% to 90% acetonitrile (0.1% trifluoroacetic acid) in water (0.1% trifluoroacetic acid) over 20 min with a flow rate of 4.0 mL/min. Peptide retention time and solvent retention time were calculated by analytical UHPLC (Shimadzu Nexera Liquid Chromatograph LC-30AD), from 10% to 90% acetonitrile (0.1% trifluoroacetic acid) in water (0.1% trifluoroacetic acid) over 15 min, eluting with flow rate of 1.0 mL/min on a C18-bonded silica column (Phenomenex Gemini 3  $\mu\text{m}$  110 $\text{\AA}$ , 4.6x150 mm), at 20 °C.

## NMR Spectroscopy Details

Spectra in water solution and micelle were recorded at a temperature of 25 °C. The spectra were calibrated relative to TSP (0.00 ppm) as internal standard. One-dimensional (1D) NMR spectra were recorded in the Fourier mode with quadrature detection. The water signal was suppressed by gradient echo.<sup>1</sup> 2D DQF-COSY, TOCSY, and NOESY spectra were recorded in the phase-sensitive mode. Data block sizes were 2048 addresses in  $t_2$  and 512 equidistant  $t_1$  values. Before Fourier transformation, the time domain data matrices were multiplied by shifted  $\sin^2$  functions in both dimensions. A mixing time of 70 ms was used for the TOCSY experiments. NOESY experiments were run with mixing times of 100 ms.  $^3J_{\text{HN-H}\alpha}$  coupling constants were obtained from 1D  $^1\text{H}$  NMR and 2D DQF-COSY spectra. The temperature coefficients of the amide proton chemical shifts were calculated from 1D  $^1\text{H}$  NMR and 2D TOCSY experiments performed at different temperatures in the range 25-40 °C by means of linear regression.

1. Hwang, T.L.; Shaka, A.J. Water suppression that works. Excitation sculpting using arbitrary wave-forms and pulsed-field gradients. *J. Magn. Reson.* **1995**, *112*, 275–279.

**Table S2.** NMR Resonance Assignments<sup>a</sup> of Peptide 1 (PG-989) *trans-trans* state in DPC Solution at 25 °C.

| residue           | NH ( <sup>3</sup> J <sub>αN</sub> , -Δδ/ΔT) <sup>b</sup> | C <sup>α</sup> H | C <sup>β</sup> H | Others                                          |
|-------------------|----------------------------------------------------------|------------------|------------------|-------------------------------------------------|
| Nleu <sup>4</sup> | 8.19 (7.1, 7.6)                                          | 4.19             | 1.67, 1.60       | 0.83(γ); 1.26(δ); 0.83(ε)                       |
| Asp <sup>5</sup>  | 8.32 (7.2, 6.7)                                          | 4.99             | 2.60, 2.53       |                                                 |
| Pro <sup>6</sup>  |                                                          | 4.57             | 2.22             | 1.86, 1.78(γ); 3.36(δ); 3.76(ε)                 |
| Pro <sup>7</sup>  |                                                          | 4.24             | 2.01, 1.38       | 1.86(γ); 3.70, 3.43(δ)                          |
| DPhe <sup>8</sup> | 8.48 (7.8, 10.1)                                         | 4.61             | 3.16, 2.74       | 7.23(δ); 7.25 (ε)                               |
| Arg <sup>9</sup>  | 7.88 (6.4, 5.5)                                          | 4.37             | 1.70, 1.59       | 1.38(γ); 3.07(δ); 7.36(ε)                       |
| Trp <sup>10</sup> | 8.34 (6.8, 7.3)                                          | 4.66             | 3.34, 3.11       | 7.21(δ); 10.47, 7.68(ε); 7.42, 7.08(ζ); 7.09(η) |
| Lys <sup>11</sup> | 8.33 (6.5, 7.7)                                          | 4.23             | 1.79, 1.65       | 1.41, 1.27(γ); 1.53(δ); 3.36, 2.97(ε); 8.09(ζ)  |

<sup>a</sup> Obtained at pH = 5, with TSP (δ 0.00 ppm) as reference shift. Chemical shifts are accurate to ±0.02 ppm.

<sup>b</sup> <sup>3</sup>J<sub>αN</sub> coupling constants in Hz. -Δδ/ΔT = temperature coefficients (ppb/K) calculated in the range 25-40 °C. Further signals: CH<sub>3</sub>CO, 1.98; CONH<sub>2</sub>, 7.04, 6.20.

**Table S3.** NMR Resonance Assignments<sup>a</sup> of Peptide **1** (PG-989) *trans-cis* state in DPC Solution at 25 °C.

| residue           | NH ( $^3J_{\alpha N}$ , $-\Delta\delta/\Delta T$ ) <sup>b</sup> | C <sup><math>\alpha</math></sup> H | C <sup><math>\beta</math></sup> H | Others                                                                              |
|-------------------|-----------------------------------------------------------------|------------------------------------|-----------------------------------|-------------------------------------------------------------------------------------|
| Nleu <sup>4</sup> | 7.88 (7.0, 7.1)                                                 | 5.03                               | 1.54, 1.48                        | 1.14( $\gamma$ ); 0.82( $\delta$ ); 0.49( $\epsilon$ )                              |
| Asp <sup>5</sup>  | 8.83 (9.3, 2.7)                                                 | 5.51                               | 2.77, 2.41                        |                                                                                     |
| Pro <sup>6</sup>  |                                                                 | 4.10                               | 2.23, 1.98                        | 2.01, 1.87( $\gamma$ ); 3.98, 3.82( $\delta$ )                                      |
| Pro <sup>7</sup>  |                                                                 | 4.33                               | 2.43, 2.03                        | 1.97, 1.54( $\gamma$ ); 3.48, 3.26( $\delta$ )                                      |
| DPhe <sup>8</sup> | 8.72 (8.6, 1.8)                                                 | 4.73                               | 2.86, 2.78                        | 6.94( $\delta$ ); 6.98( $\epsilon$ )                                                |
| Arg <sup>9</sup>  | 8.51 (8.6, 1.9)                                                 | 4.72                               | 1.87, 1.68                        | 1.56, 1.46( $\gamma$ ); 3.24( $\delta$ ); 7.35( $\epsilon$ )                        |
| Trp <sup>10</sup> | 9.08 (7.5, 6.4)                                                 | 5.19                               | 3.38, 3.12                        | 7.26( $\delta$ ); 10.68, 7.61( $\epsilon$ ); 7.47, 6.93( $\zeta$ ); 7.05( $\eta$ )  |
| Lys <sup>11</sup> | 8.68 (7.7, 3.6)                                                 | 4.11                               | 1.68, 1.49                        | 1.26, 1.15( $\gamma$ ); 1.47( $\delta$ ); 3.39, 2.97( $\epsilon$ ); 7.91( $\zeta$ ) |

<sup>a</sup> Obtained at pH = 5, with TSP ( $\delta$  0.00 ppm) as reference shift. Chemical shifts are accurate to  $\pm 0.02$  ppm.

<sup>b</sup>  $^3J_{\alpha N}$  coupling constants in Hz.  $-\Delta\delta/\Delta T$  = temperature coefficients (ppb/K) calculated in the range 25-40 °C. Further signals:  $\underline{\text{C}}\underline{\text{H}}_3\text{CO}$ , 1.86;  $\text{CONH}\underline{\text{H}}_2$ , 7.09, 6.20.

**Table S4.** NMR Resonance Assignments<sup>a</sup> of Peptide **2** (PG-990) *trans-trans* state in DPC Solution at 25 °C.

| residue               | NH ( <sup>3</sup> J <sub>αN</sub> , exc, -Δδ/ΔT) <sup>b</sup> | C <sup>α</sup> H | C <sup>β</sup> H | Others                                          |
|-----------------------|---------------------------------------------------------------|------------------|------------------|-------------------------------------------------|
| Nleu <sup>4</sup>     | 8.17 (6.5, 7.5)                                               | 4.21             | 1.68, 1.62       | 0.91(γ); 1.27(δ)                                |
| Asp <sup>5</sup>      | 8.33 (7.1, 6.3)                                               | 5.01             | 2.61, 2.55       |                                                 |
| Pro <sup>6</sup>      |                                                               | 4.54             | 2.18             | 1.85, 1.75(γ); 3.76, 3.35(δ)                    |
| Pro <sup>7</sup>      |                                                               | 4.35             | 1.55, 1.43       | 1.30(γ); 3.66, 3.36(δ)                          |
| DNal(2') <sup>8</sup> | 8.63 (6.7, 9.3)                                               | 4.67             | 3.33, 2.90       | 7.71, 7.41(δ); 7.77, 7.48(ε); 7.10(ζ)           |
| Arg <sup>9</sup>      | 7.90 (bs, 4.7)                                                | 4.42             | 1.73, 1.60       | 1.38(γ) 3.05(δ); 7.36(ε)                        |
| Trp <sup>10</sup>     | 8.33 (6.8, 7.3)                                               | 4.68             | 3.36, 3.11       | 7.21(δ); 10.51, 7.70(ε); 7.84, 7.42(ζ); 7,10(η) |
| Lys <sup>11</sup>     | 8.41 (6.5, 8.3)                                               | 4.25             | 1.81, 1.69       | 1.43, 1.31(γ); 1.54(δ); 3.36, 2.99(ε); 8.11(ζ)  |

<sup>a</sup> Obtained at pH = 5, with TSP (δ 0.00 ppm) as reference shift. Chemical shifts are accurate to ±0.02 ppm.

<sup>b</sup> <sup>3</sup>J<sub>αN</sub> coupling constants in Hz. -Δδ/ΔT = temperature coefficients (ppb/K) calculated in the range 25-40 °C. bs: broad signal. Further signals: CH<sub>3</sub>CO, 1.99; CONH<sub>2</sub>, 7.08, 6.01.

**Table S5.** NMR Resonance Assignments<sup>a</sup> of Peptide **2** (PG-990) *trans-cis* state in DPC Solution at 25 °C.

| residue               | NH ( <sup>3</sup> J <sub>αN</sub> , exc, -Δδ/ΔT) <sup>b</sup> | C <sup>α</sup> H | C <sup>β</sup> H | Others                                          |
|-----------------------|---------------------------------------------------------------|------------------|------------------|-------------------------------------------------|
| Nleu <sup>4</sup>     | 7.91 (9.2, 7.1)                                               | 5.12             | 1.63, 1.56       | 0.85, 0.78(γ); 1.22(δ); 0.41(ε)                 |
| Asp <sup>5</sup>      | 8.84 (8.8, 3.1)                                               | 5.56             | 2.79, 2.42       |                                                 |
| Pro <sup>6</sup>      |                                                               | 3.82             | 1.89, 1.71       | 2.07, 1.62(γ); 3.93, 3.76(δ)                    |
| Pro <sup>7</sup>      |                                                               | 4.21             | 2.43, 1.71       | 1.97, 1.51(γ); 3.46, 3.25(δ)                    |
| DNal(2') <sup>8</sup> | 8.83 (8.4, 2.7)                                               | 4.92             | 3.11, 3.00       | 7.42, 7.17(δ); 7.60(ε); 7.77(ζ)                 |
| Arg <sup>9</sup>      | 8.58 (9.0, 3.4)                                               | 4.79             | 1.91, 1.71       | 1.58, 1.48(γ); 3.24(δ); 7.38(ε)                 |
| Trp <sup>10</sup>     | 9.15 (6.3, 7.5)                                               | 5.27             | 3.40, 3.17       | 7.27(δ); 10.68, 7.70(ε); 7.49, 6.95(ζ); 7.07(η) |
| Lys <sup>11</sup>     | 8.73 (7.6, 4.7)                                               | 4.11             | 1.68, 1.48       | 1.27, 1.17(γ); 1.45(δ); 3.42, 2.96(ε); 7.96(ζ)  |

<sup>a</sup> Obtained at pH = 5, with TSP (δ 0.00 ppm) as reference shift. Chemical shifts are accurate to ±0.02 ppm.

<sup>b</sup> <sup>3</sup>J<sub>αN</sub> coupling constants in Hz. -Δδ/ΔT = temperature coefficients (ppb/K) calculated in the range 25-40 °C. Further signals: CH<sub>3</sub>CO, 1.86; CONH<sub>2</sub>, 7.09, 6.01.

**Table S6.** NMR Resonance Assignments<sup>a</sup> of Peptide 4 (PG-992) in DPC Solution at 25 °C.

| residue               | NH ( $^3J_{\alpha N}$ , $-\Delta\delta/\Delta T$ ) <sup>b</sup> | C <sup><math>\alpha</math></sup> H | C <sup><math>\beta</math></sup> H | Others                                                                              |
|-----------------------|-----------------------------------------------------------------|------------------------------------|-----------------------------------|-------------------------------------------------------------------------------------|
| Nleu <sup>4</sup>     | 7.98 (7.1, 8.2)                                                 | 5.02                               | 1.66, 1.52                        | 0.84, 0.64( $\gamma$ ); 1.16( $\delta$ ); 0.37( $\epsilon$ )                        |
| Asp <sup>5</sup>      | 8.81 (9.2, 2.9)                                                 | 5.51                               | 2.93, 2.54                        |                                                                                     |
| Trp <sup>6</sup>      | 7.93 (bs, nd)                                                   | 3.96                               | 3.10, 3.06                        | 6.97 ( $\delta$ ); 10.68, 6.25( $\epsilon$ ); 7.42, 6.66( $\zeta$ ); 7.00( $\eta$ ) |
| Pro <sup>7</sup>      |                                                                 | 2.71                               | 1.63, 0.23                        | 1.61, 1.17( $\gamma$ ); 3.31, 3.05( $\delta$ )                                      |
| DNal(2') <sup>8</sup> | 8.87 (8.5, 2.7)                                                 | 4.84                               | 3.06, 2.83                        | 7.38, 7.11( $\delta$ ); 7.92, 7.55( $\epsilon$ ); 7.89, 7.51( $\zeta$ )             |
| Arg <sup>9</sup>      | 8.31 (8.6, 2.7)                                                 | 4.73                               | 1.88, 1.67                        | 1.53, 1.45( $\gamma$ ); 3.16( $\delta$ ); 7.15( $\epsilon$ )                        |
| Trp <sup>10</sup>     | 9.08 (6.7, 6.5)                                                 | 5.17                               | 3.39, 3.15                        | 7.30( $\delta$ ); 10.67, 7.70( $\epsilon$ ); 7.50, 6.96( $\zeta$ ); 7.08( $\eta$ )  |
| Lys <sup>11</sup>     | 8.69 (7.2, 4.0)                                                 | 4.18                               | 1.74, 1.53                        | 1.31, 1.20( $\gamma$ ); 1.45( $\delta$ ); 3.38, 3.06( $\epsilon$ ); 7.88( $\zeta$ ) |

<sup>a</sup> Obtained at pH = 5, with TSP ( $\delta$  0.00 ppm) as reference shift. Chemical shifts are accurate to  $\pm 0.02$  ppm.

<sup>b</sup>  $^3J_{\alpha N}$  coupling constants in Hz.  $-\Delta\delta/\Delta T$  = temperature coefficients (ppb/K) calculated in the range 25-40 °C. bs: broad signal; nd: not determinable. Further signals:  $\underline{\text{CH}}_3\text{CO}$ , 1.91;  $\text{CONH}\underline{2}$ , 7.12, 6.50.



**Table S7.** NOE derived upper limit constraints for peptides **1, 2, 4.**Peptide **1**:

|   |      |     |    |      |     |      |
|---|------|-----|----|------|-----|------|
| 3 | ACE  | QH  | 11 | LYS  | HN  | 5.72 |
| 4 | NLE  | HN  | 4  | NLE  | HB2 | 3.48 |
| 4 | NLE  | HN  | 4  | NLE  | HB3 | 3.48 |
| 4 | NLE  | HN  | 4  | NLE  | QB  | 2.96 |
| 4 | NLE  | HN  | 4  | NLE  | QD  | 6.38 |
| 4 | NLE  | HN  | 5  | ASP  | HN  | 4.29 |
| 4 | NLE  | HA  | 5  | ASP  | HN  | 2.62 |
| 4 | NLE  | HA  | 10 | TRP  | HA  | 3.17 |
| 4 | NLE  | HA  | 10 | TRP  | HE3 | 4.38 |
| 4 | NLE  | HA  | 11 | LYS  | HN  | 3.45 |
| 4 | NLE  | HB2 | 4  | NLE  | QE  | 6.53 |
| 4 | NLE  | HB2 | 5  | ASP  | HN  | 3.73 |
| 4 | NLE  | HB3 | 4  | NLE  | QE  | 6.53 |
| 4 | NLE  | HB3 | 5  | ASP  | HN  | 3.73 |
| 4 | NLE  | QB  | 4  | NLE  | QE  | 5.70 |
| 4 | NLE  | QG  | 8  | DPHE | QE  | 8.50 |
| 4 | NLE  | QD  | 5  | ASP  | HN  | 6.38 |
| 4 | NLE  | QD  | 8  | DPHE | QE  | 8.51 |
| 4 | NLE  | QD  | 10 | TRP  | HE3 | 6.38 |
| 4 | NLE  | QE  | 8  | DPHE | QE  | 8.65 |
| 4 | NLE  | QE  | 10 | TRP  | HE3 | 5.94 |
| 5 | ASP  | HN  | 5  | ASP  | HB2 | 3.39 |
| 5 | ASP  | HN  | 5  | ASP  | HB3 | 3.39 |
| 5 | ASP  | HN  | 5  | ASP  | QB  | 2.89 |
| 5 | ASP  | HN  | 11 | LYS  | HN  | 4.23 |
| 5 | ASP  | HN  | 11 | LYS  | HZ1 | 4.97 |
| 5 | ASP  | HA  | 6  | PRO  | HD2 | 3.39 |
| 5 | ASP  | HA  | 6  | PRO  | HD3 | 3.39 |
| 5 | ASP  | HA  | 6  | PRO  | QD  | 2.93 |
| 5 | ASP  | HA  | 11 | LYS  | HZ1 | 5.13 |
| 5 | ASP  | HB2 | 11 | LYS  | HZ1 | 3.70 |
| 5 | ASP  | HB3 | 11 | LYS  | HZ1 | 3.70 |
| 5 | ASP  | QB  | 6  | PRO  | QD  | 3.79 |
| 5 | ASP  | QB  | 11 | LYS  | HZ1 | 3.00 |
| 6 | PRO  | HA  | 7  | PRO  | HA  | 2.49 |
| 6 | PRO  | HA  | 8  | DPHE | HN  | 2.83 |
| 6 | PRO  | HA  | 8  | DPHE | QD  | 7.03 |
| 6 | PRO  | HA  | 8  | DPHE | QE  | 7.62 |
| 6 | PRO  | HA  | 9  | ARG  | HN  | 4.17 |
| 7 | PRO  | HA  | 8  | DPHE | HN  | 3.42 |
| 7 | PRO  | HD2 | 8  | DPHE | HN  | 4.69 |
| 7 | PRO  | HD3 | 8  | DPHE | HN  | 5.50 |
| 8 | DPHE | HN  | 8  | DPHE | HB2 | 3.36 |
| 8 | DPHE | HN  | 8  | DPHE | HB3 | 3.36 |
| 8 | DPHE | HN  | 8  | DPHE | QD  | 7.62 |
| 8 | DPHE | HN  | 8  | DPHE | QE  | 7.62 |
| 8 | DPHE | HN  | 9  | ARG  | HN  | 2.80 |
| 8 | DPHE | HA  | 8  | DPHE | QD  | 6.13 |
| 8 | DPHE | HA  | 9  | ARG  | HN  | 3.55 |
| 8 | DPHE | HB2 | 9  | ARG  | HN  | 2.99 |
| 8 | DPHE | HB3 | 9  | ARG  | HN  | 2.99 |
| 8 | DPHE | QD  | 9  | ARG  | HN  | 7.34 |
| 8 | DPHE | QE  | 9  | ARG  | HN  | 7.62 |

|    |     |     |    |      |     |      |
|----|-----|-----|----|------|-----|------|
| 9  | ARG | HN  | 9  | ARG  | HB2 | 3.58 |
| 9  | ARG | HN  | 9  | ARG  | HB3 | 3.58 |
| 9  | ARG | HN  | 9  | ARG  | QB  | 3.01 |
| 9  | ARG | HN  | 9  | ARG  | HG2 | 4.88 |
| 9  | ARG | HN  | 9  | ARG  | HG3 | 4.88 |
| 9  | ARG | HN  | 10 | TRP  | HN  | 4.32 |
| 9  | ARG | HA  | 10 | TRP  | HN  | 2.62 |
| 9  | ARG | HB2 | 10 | TRP  | HN  | 3.95 |
| 9  | ARG | HB3 | 10 | TRP  | HN  | 3.95 |
| 9  | ARG | QB  | 10 | TRP  | HN  | 3.23 |
| 10 | TRP | HN  | 10 | TRP  | HB2 | 3.08 |
| 10 | TRP | HN  | 10 | TRP  | HB3 | 3.08 |
| 10 | TRP | HN  | 10 | TRP  | HD1 | 4.32 |
| 10 | TRP | HN  | 10 | TRP  | HE3 | 5.50 |
| 10 | TRP | HN  | 11 | LYS  | HN  | 4.35 |
| 10 | TRP | HA  | 10 | TRP  | HD1 | 4.85 |
| 10 | TRP | HA  | 10 | TRP  | HE3 | 2.93 |
| 10 | TRP | HA  | 11 | LYS  | HN  | 2.65 |
| 10 | TRP | HB2 | 10 | TRP  | HD1 | 3.52 |
| 10 | TRP | HB2 | 10 | TRP  | HE3 | 4.01 |
| 10 | TRP | HB2 | 11 | LYS  | HN  | 4.11 |
| 10 | TRP | HB3 | 10 | TRP  | HD1 | 3.52 |
| 10 | TRP | HB3 | 10 | TRP  | HE3 | 4.01 |
| 10 | TRP | HB3 | 11 | LYS  | HN  | 4.11 |
| 10 | TRP | QB  | 10 | TRP  | HE3 | 3.46 |
| 10 | TRP | QB  | 11 | LYS  | HN  | 3.54 |
| 10 | TRP | HD1 | 11 | LYS  | HN  | 5.50 |
| 10 | TRP | HD1 | 12 | CNH2 | HN1 | 4.63 |
| 10 | TRP | HE3 | 11 | LYS  | HN  | 4.11 |
| 10 | TRP | HE1 | 12 | CNH2 | HN1 | 5.25 |
| 10 | TRP | HZ2 | 12 | CNH2 | HN1 | 5.50 |
| 11 | LYS | HN  | 11 | LYS  | HB2 | 3.52 |
| 11 | LYS | HN  | 11 | LYS  | HB3 | 3.52 |
| 11 | LYS | HN  | 11 | LYS  | QB  | 2.99 |
| 11 | LYS | HN  | 11 | LYS  | HG2 | 4.32 |
| 11 | LYS | HN  | 11 | LYS  | HG3 | 4.32 |
| 11 | LYS | HN  | 11 | LYS  | QG  | 3.73 |
| 11 | LYS | HN  | 11 | LYS  | QD  | 6.00 |
| 11 | LYS | HN  | 12 | CNH2 | HN1 | 4.11 |
| 11 | LYS | HN  | 12 | CNH2 | HN2 | 5.22 |
| 11 | LYS | HA  | 11 | LYS  | QG  | 3.66 |
| 11 | LYS | HA  | 11 | LYS  | QD  | 5.07 |
| 11 | LYS | QB  | 11 | LYS  | QG  | 2.29 |
| 11 | LYS | HG2 | 11 | LYS  | HZ1 | 4.66 |
| 11 | LYS | HG3 | 11 | LYS  | HZ1 | 4.66 |
| 11 | LYS | QG  | 11 | LYS  | HZ1 | 4.08 |

Peptide **2**:

|   |     |    |    |     |     |      |
|---|-----|----|----|-----|-----|------|
| 3 | ACE | QH | 11 | LYS | HN  | 5.50 |
| 4 | NLE | HN | 4  | NLE | HB2 | 3.52 |
| 4 | NLE | HN | 4  | NLE | HB3 | 3.52 |
| 4 | NLE | HN | 4  | NLE | QB  | 2.99 |
| 4 | NLE | HN | 4  | NLE | QD  | 5.58 |
| 4 | NLE | HN | 5  | ASP | HN  | 4.57 |
| 4 | NLE | HA | 5  | ASP | HN  | 2.71 |
| 4 | NLE | HA | 10 | TRP | HE3 | 4.42 |
| 4 | NLE | HA | 11 | LYS | HN  | 3.42 |

|   |      |     |    |      |     |      |
|---|------|-----|----|------|-----|------|
| 4 | NLE  | HB2 | 5  | ASP  | HN  | 3.64 |
| 4 | NLE  | HB3 | 5  | ASP  | HN  | 3.64 |
| 4 | NLE  | QB  | 8  | DBNA | HD1 | 5.34 |
| 4 | NLE  | HG2 | 8  | DBNA | HD2 | 5.50 |
| 4 | NLE  | HG3 | 8  | DBNA | HD2 | 5.50 |
| 4 | NLE  | QD  | 5  | ASP  | HN  | 6.38 |
| 4 | NLE  | QD  | 8  | DBNA | HD1 | 6.38 |
| 4 | NLE  | QD  | 8  | DBNA | HD2 | 5.86 |
| 4 | NLE  | QD  | 10 | TRP  | HE3 | 5.39 |
| 4 | NLE  | QD  | 10 | TRP  | HZ3 | 6.23 |
| 4 | NLE  | QE  | 8  | DBNA | HZ2 | 6.00 |
| 4 | NLE  | QE  | 8  | DBNA | HD2 | 5.85 |
| 4 | NLE  | QE  | 10 | TRP  | HE3 | 5.48 |
| 4 | NLE  | QE  | 10 | TRP  | HZ3 | 5.54 |
| 5 | ASP  | HN  | 5  | ASP  | HB2 | 3.42 |
| 5 | ASP  | HN  | 5  | ASP  | HB3 | 3.42 |
| 5 | ASP  | HN  | 5  | ASP  | QB  | 2.92 |
| 5 | ASP  | HN  | 11 | LYS  | HN  | 3.98 |
| 5 | ASP  | HN  | 11 | LYS  | HZ1 | 4.51 |
| 5 | ASP  | HA  | 6  | PRO  | HD2 | 3.36 |
| 5 | ASP  | HA  | 6  | PRO  | HD3 | 3.36 |
| 5 | ASP  | HA  | 11 | LYS  | HZ1 | 4.97 |
| 5 | ASP  | HB2 | 11 | LYS  | HZ1 | 3.52 |
| 5 | ASP  | HB3 | 11 | LYS  | HZ1 | 3.52 |
| 5 | ASP  | QB  | 6  | PRO  | QD  | 3.81 |
| 5 | ASP  | QB  | 11 | LYS  | HZ1 | 3.03 |
| 6 | PRO  | HA  | 7  | PRO  | HA  | 2.65 |
| 6 | PRO  | HA  | 8  | DBNA | HN  | 2.90 |
| 6 | PRO  | HA  | 8  | DBNA | HD1 | 5.00 |
| 6 | PRO  | HA  | 8  | DBNA | HD2 | 5.12 |
| 6 | PRO  | HA  | 9  | ARG  | HN  | 3.79 |
| 6 | PRO  | QD  | 8  | DBNA | HZ2 | 4.87 |
| 7 | PRO  | HA  | 8  | DBNA | HN  | 3.36 |
| 7 | PRO  | HD2 | 8  | DBNA | HN  | 4.66 |
| 7 | PRO  | HD3 | 8  | DBNA | HN  | 5.34 |
| 8 | DBNA | HN  | 8  | DBNA | HB2 | 3.24 |
| 8 | DBNA | HN  | 8  | DBNA | HB3 | 3.24 |
| 8 | DBNA | HN  | 8  | DBNA | HD1 | 4.63 |
| 8 | DBNA | HN  | 8  | DBNA | HD2 | 4.14 |
| 8 | DBNA | HN  | 9  | ARG  | HN  | 3.90 |
| 8 | DBNA | HA  | 8  | DBNA | HD1 | 3.97 |
| 8 | DBNA | HA  | 8  | DBNA | HD2 | 4.34 |
| 8 | DBNA | HA  | 9  | ARG  | HN  | 3.58 |
| 8 | DBNA | HB2 | 8  | DBNA | HD2 | 3.30 |
| 8 | DBNA | HB2 | 9  | ARG  | HN  | 3.08 |
| 8 | DBNA | HB3 | 8  | DBNA | HD2 | 3.30 |
| 8 | DBNA | HB3 | 9  | ARG  | HN  | 3.68 |
| 8 | DBNA | QB  | 8  | DBNA | HD1 | 3.33 |
| 8 | DBNA | QB  | 8  | DBNA | HD2 | 2.88 |
| 8 | DBNA | HD1 | 9  | ARG  | HN  | 4.69 |
| 8 | DBNA | HD2 | 9  | ARG  | HN  | 4.81 |
| 9 | ARG  | HN  | 9  | ARG  | HB2 | 3.52 |
| 9 | ARG  | HN  | 9  | ARG  | HB3 | 3.52 |
| 9 | ARG  | HN  | 9  | ARG  | QB  | 3.04 |
| 9 | ARG  | HN  | 9  | ARG  | HG2 | 4.76 |
| 9 | ARG  | HN  | 9  | ARG  | HG3 | 4.76 |
| 9 | ARG  | HN  | 10 | TRP  | HN  | 4.82 |

|    |     |     |    |      |     |      |
|----|-----|-----|----|------|-----|------|
| 9  | ARG | HA  | 10 | TRP  | HN  | 2.99 |
| 9  | ARG | HB2 | 10 | TRP  | HN  | 3.67 |
| 9  | ARG | HB3 | 10 | TRP  | HN  | 3.67 |
| 9  | ARG | QB  | 10 | TRP  | HN  | 3.16 |
| 10 | TRP | HN  | 10 | TRP  | HB2 | 3.08 |
| 10 | TRP | HN  | 10 | TRP  | HB3 | 3.08 |
| 10 | TRP | HN  | 10 | TRP  | HD1 | 4.26 |
| 10 | TRP | HN  | 10 | TRP  | HE3 | 5.38 |
| 10 | TRP | HN  | 11 | LYS  | HN  | 4.14 |
| 10 | TRP | HA  | 10 | TRP  | HD1 | 4.76 |
| 10 | TRP | HA  | 10 | TRP  | HE3 | 3.14 |
| 10 | TRP | HA  | 11 | LYS  | HN  | 2.77 |
| 10 | TRP | HB2 | 10 | TRP  | HD1 | 3.67 |
| 10 | TRP | HB2 | 10 | TRP  | HE3 | 4.04 |
| 10 | TRP | HB2 | 11 | LYS  | HN  | 3.86 |
| 10 | TRP | HB3 | 10 | TRP  | HD1 | 3.67 |
| 10 | TRP | HB3 | 10 | TRP  | HE3 | 4.04 |
| 10 | TRP | HB3 | 11 | LYS  | HN  | 3.86 |
| 10 | TRP | QB  | 10 | TRP  | HD1 | 3.14 |
| 10 | TRP | HD1 | 11 | LYS  | HN  | 5.13 |
| 10 | TRP | HD1 | 12 | CNH2 | HN1 | 4.60 |
| 10 | TRP | HE3 | 11 | LYS  | HN  | 4.01 |
| 10 | TRP | HE1 | 12 | CNH2 | HN1 | 4.85 |
| 10 | TRP | HZ2 | 12 | CNH2 | HN1 | 5.41 |
| 11 | LYS | HN  | 11 | LYS  | HB2 | 3.39 |
| 11 | LYS | HN  | 11 | LYS  | HB3 | 3.39 |
| 11 | LYS | HN  | 11 | LYS  | QB  | 2.93 |
| 11 | LYS | HN  | 11 | LYS  | HG2 | 4.23 |
| 11 | LYS | HN  | 11 | LYS  | HG3 | 4.23 |
| 11 | LYS | HN  | 11 | LYS  | QD  | 6.38 |
| 11 | LYS | HN  | 12 | CNH2 | HN1 | 3.95 |
| 11 | LYS | HN  | 12 | CNH2 | HN2 | 4.54 |
| 11 | LYS | HA  | 11 | LYS  | QG  | 3.72 |
| 11 | LYS | HA  | 11 | LYS  | QD  | 5.79 |
| 11 | LYS | HG2 | 11 | LYS  | HZ1 | 4.51 |
| 11 | LYS | HG3 | 11 | LYS  | HZ1 | 4.51 |

Peptide **4**:

|   |     |     |    |      |     |      |
|---|-----|-----|----|------|-----|------|
| 3 | ACE | QH  | 11 | LYS  | HN  | 5.78 |
| 4 | NLE | HN  | 4  | NLE  | HB2 | 3.58 |
| 4 | NLE | HN  | 4  | NLE  | HB3 | 3.58 |
| 4 | NLE | HN  | 4  | NLE  | QB  | 2.99 |
| 4 | NLE | HN  | 4  | NLE  | QD  | 6.04 |
| 4 | NLE | HN  | 5  | ASP  | HN  | 4.45 |
| 4 | NLE | HA  | 5  | ASP  | HN  | 2.65 |
| 4 | NLE | HA  | 10 | TRP  | HA  | 3.17 |
| 4 | NLE | HA  | 10 | TRP  | HE3 | 4.17 |
| 4 | NLE | HA  | 11 | LYS  | HN  | 3.39 |
| 4 | NLE | HB2 | 5  | ASP  | HN  | 3.58 |
| 4 | NLE | HB2 | 8  | DBNA | HD1 | 5.50 |
| 4 | NLE | HB2 | 10 | TRP  | HE3 | 4.97 |
| 4 | NLE | HB3 | 5  | ASP  | HN  | 3.58 |
| 4 | NLE | HB3 | 8  | DBNA | HD1 | 5.50 |
| 4 | NLE | HB3 | 10 | TRP  | HE3 | 4.97 |
| 4 | NLE | QB  | 8  | DBNA | HD2 | 4.26 |
| 4 | NLE | QB  | 10 | TRP  | HE3 | 4.29 |
| 4 | NLE | QB  | 10 | TRP  | HZ3 | 5.19 |

|   |      |     |    |      |     |      |
|---|------|-----|----|------|-----|------|
| 4 | NLE  | QG  | 8  | DBNA | HD2 | 4.53 |
| 4 | NLE  | QG  | 10 | TRP  | HE3 | 4.73 |
| 4 | NLE  | QG  | 10 | TRP  | HZ3 | 4.85 |
| 4 | NLE  | QD  | 5  | ASP  | HN  | 6.38 |
| 4 | NLE  | QD  | 8  | DBNA | HD1 | 6.38 |
| 4 | NLE  | QD  | 8  | DBNA | HD2 | 6.10 |
| 4 | NLE  | QD  | 10 | TRP  | HE3 | 5.76 |
| 4 | NLE  | QD  | 10 | TRP  | HZ3 | 6.38 |
| 4 | NLE  | QE  | 8  | DBNA | HE3 | 6.53 |
| 4 | NLE  | QE  | 8  | DBNA | HD2 | 5.85 |
| 4 | NLE  | QE  | 10 | TRP  | HE3 | 5.66 |
| 4 | NLE  | QE  | 10 | TRP  | HZ3 | 5.60 |
| 5 | ASP  | HN  | 5  | ASP  | HB2 | 3.52 |
| 5 | ASP  | HN  | 5  | ASP  | HB3 | 3.52 |
| 5 | ASP  | HN  | 5  | ASP  | QB  | 2.98 |
| 5 | ASP  | HN  | 10 | TRP  | HA  | 3.89 |
| 5 | ASP  | HN  | 11 | LYS  | HN  | 3.89 |
| 5 | ASP  | HN  | 11 | LYS  | HZ1 | 4.88 |
| 5 | ASP  | HA  | 11 | LYS  | HZ1 | 4.72 |
| 5 | ASP  | HB2 | 11 | LYS  | HZ1 | 3.48 |
| 5 | ASP  | HB3 | 11 | LYS  | HZ1 | 3.48 |
| 5 | ASP  | QB  | 11 | LYS  | HZ1 | 2.90 |
| 6 | TRP  | HN  | 6  | TRP  | QB  | 3.62 |
| 6 | TRP  | HA  | 6  | TRP  | HD1 | 4.97 |
| 6 | TRP  | HA  | 6  | TRP  | HE3 | 3.70 |
| 6 | TRP  | HA  | 7  | PRO  | HA  | 2.59 |
| 6 | TRP  | HA  | 8  | DBNA | HN  | 2.96 |
| 6 | TRP  | HA  | 8  | DBNA | HD1 | 5.31 |
| 6 | TRP  | HA  | 8  | DBNA | HD2 | 3.95 |
| 6 | TRP  | HA  | 9  | ARG  | HN  | 4.17 |
| 6 | TRP  | QB  | 6  | TRP  | HD1 | 3.39 |
| 6 | TRP  | QB  | 6  | TRP  | HE3 | 3.61 |
| 6 | TRP  | HD1 | 7  | PRO  | HA  | 4.66 |
| 6 | TRP  | HD1 | 7  | PRO  | HB2 | 5.04 |
| 6 | TRP  | HD1 | 7  | PRO  | HB3 | 5.04 |
| 6 | TRP  | HD1 | 7  | PRO  | QB  | 4.38 |
| 6 | TRP  | HD1 | 7  | PRO  | QD  | 4.23 |
| 6 | TRP  | HE3 | 7  | PRO  | HA  | 3.92 |
| 6 | TRP  | HE3 | 8  | DBNA | HZ2 | 4.97 |
| 6 | TRP  | HZ3 | 8  | DBNA | HE1 | 5.19 |
| 6 | TRP  | HZ3 | 8  | DBNA | HZ2 | 4.35 |
| 7 | PRO  | HA  | 8  | DBNA | HN  | 3.30 |
| 7 | PRO  | QD  | 8  | DBNA | HN  | 4.96 |
| 8 | DBNA | HN  | 8  | DBNA | HB2 | 3.80 |
| 8 | DBNA | HN  | 8  | DBNA | HB3 | 3.80 |
| 8 | DBNA | HN  | 8  | DBNA | HD1 | 5.10 |
| 8 | DBNA | HN  | 8  | DBNA | HD2 | 4.14 |
| 8 | DBNA | HN  | 9  | ARG  | HN  | 2.77 |
| 8 | DBNA | HA  | 8  | DBNA | HD1 | 2.86 |
| 8 | DBNA | HA  | 8  | DBNA | HD2 | 4.67 |
| 8 | DBNA | HA  | 9  | ARG  | HN  | 3.61 |
| 8 | DBNA | HB2 | 8  | DBNA | HD1 | 3.73 |
| 8 | DBNA | HB2 | 8  | DBNA | HD2 | 3.21 |
| 8 | DBNA | HB2 | 9  | ARG  | HN  | 3.02 |
| 8 | DBNA | HB3 | 8  | DBNA | HD1 | 3.73 |
| 8 | DBNA | HB3 | 8  | DBNA | HD2 | 3.21 |
| 8 | DBNA | HB3 | 9  | ARG  | HN  | 3.02 |

|    |      |     |    |      |     |      |
|----|------|-----|----|------|-----|------|
| 8  | DBNA | QB  | 8  | DBNA | HD1 | 3.13 |
| 8  | DBNA | QB  | 8  | DBNA | HD2 | 2.73 |
| 8  | DBNA | HD1 | 9  | ARG  | HN  | 4.85 |
| 8  | DBNA | HD2 | 9  | ARG  | HN  | 4.38 |
| 9  | ARG  | HN  | 9  | ARG  | HB2 | 3.11 |
| 9  | ARG  | HN  | 9  | ARG  | HB3 | 3.52 |
| 9  | ARG  | HN  | 9  | ARG  | HG2 | 4.72 |
| 9  | ARG  | HN  | 9  | ARG  | HG3 | 4.72 |
| 9  | ARG  | HN  | 9  | ARG  | QG  | 4.15 |
| 9  | ARG  | HN  | 10 | TRP  | HN  | 4.23 |
| 9  | ARG  | HA  | 10 | TRP  | HN  | 2.68 |
| 9  | ARG  | HB2 | 10 | TRP  | HN  | 3.73 |
| 9  | ARG  | HB3 | 10 | TRP  | HN  | 3.48 |
| 10 | TRP  | HN  | 10 | TRP  | HB2 | 3.11 |
| 10 | TRP  | HN  | 10 | TRP  | HB3 | 3.11 |
| 10 | TRP  | HN  | 10 | TRP  | HD1 | 4.42 |
| 10 | TRP  | HN  | 10 | TRP  | HE3 | 5.50 |
| 10 | TRP  | HN  | 11 | LYS  | HN  | 4.57 |
| 10 | TRP  | HA  | 10 | TRP  | HD1 | 4.82 |
| 10 | TRP  | HA  | 10 | TRP  | HE3 | 2.96 |
| 10 | TRP  | HA  | 11 | LYS  | HN  | 2.65 |
| 10 | TRP  | HB2 | 10 | TRP  | HD1 | 3.39 |
| 10 | TRP  | HB2 | 10 | TRP  | HE3 | 3.89 |
| 10 | TRP  | HB2 | 11 | LYS  | HN  | 4.11 |
| 10 | TRP  | HB3 | 10 | TRP  | HD1 | 3.39 |
| 10 | TRP  | HB3 | 10 | TRP  | HE3 | 3.89 |
| 10 | TRP  | HB3 | 11 | LYS  | HN  | 4.11 |
| 10 | TRP  | QB  | 10 | TRP  | HD1 | 2.95 |
| 10 | TRP  | HD1 | 12 | CNH2 | HN1 | 5.50 |
| 10 | TRP  | HE3 | 11 | LYS  | HN  | 4.26 |
| 10 | TRP  | HE1 | 12 | CNH2 | HN1 | 5.50 |
| 11 | LYS  | HN  | 11 | LYS  | HB2 | 3.45 |
| 11 | LYS  | HN  | 11 | LYS  | HB3 | 3.45 |
| 11 | LYS  | HN  | 11 | LYS  | QB  | 2.88 |
| 11 | LYS  | HN  | 11 | LYS  | HG2 | 4.38 |
| 11 | LYS  | HN  | 11 | LYS  | HG3 | 4.38 |
| 11 | LYS  | HN  | 11 | LYS  | QG  | 3.78 |
| 11 | LYS  | HN  | 12 | CNH2 | HN1 | 4.76 |
| 11 | LYS  | HA  | 11 | LYS  | HB2 | 2.96 |
| 11 | LYS  | HA  | 11 | LYS  | HB3 | 2.96 |
| 11 | LYS  | HA  | 11 | LYS  | QB  | 2.57 |
| 11 | LYS  | HA  | 11 | LYS  | HG2 | 4.01 |
| 11 | LYS  | HA  | 11 | LYS  | HG3 | 4.01 |
| 11 | LYS  | HA  | 11 | LYS  | QG  | 3.38 |
| 11 | LYS  | HA  | 11 | LYS  | QD  | 5.91 |
| 11 | LYS  | HG2 | 11 | LYS  | HZ1 | 4.51 |
| 11 | LYS  | HG3 | 11 | LYS  | HZ1 | 4.51 |
| 11 | LYS  | QG  | 11 | LYS  | QE  | 3.24 |

ACE QH is the methyl group of the N-terminal acetyl function. CNH2 HN1 is one of the amide protons of the C-terminal carboxamide function. NLE: Norleucine; DBNA: D(2')Naphthylalanine.

**Table S8.** Statistical analysis of predicted I-TASSER best scored model.

| Properties            | <i>h</i> MC3R | <i>h</i> MC4R |
|-----------------------|---------------|---------------|
| C-score <sup>a</sup>  | 0.42          | 0.66          |
| TM-score <sup>b</sup> | 0.77 ± 0.10   | 0.80 ± 0.09   |
| RMSD (Å)              | 5.4 ± 3.4     | 4.8 ± 3.1     |

<sup>a</sup> C-score: confidence score; The C-score is computed from the threading alignments for the estimated quality of the models. Ranging from 5 to +2, a C-score > 1.5 implies a model with a correct fold.

<sup>b</sup> TM-score template modelling score; The TM score is a measure of the structural similarity between the model and the native structure. A TM score > +0.5 suggests a model with correct topology.

**Table S9.** Docking statistics and energy terms.

| <b>Complex</b> | <b>Cluster n.</b> | <b>Cluster size</b> | <b><math>\Delta G_{\text{bind}}^a</math></b> | <b>Electr<sup>b</sup></b> | <b>H-Bond<sup>b</sup>+VdW<sup>b</sup>+Des</b> | <b>Tors<sup>b</sup></b> |
|----------------|-------------------|---------------------|----------------------------------------------|---------------------------|-----------------------------------------------|-------------------------|
| 2/hMC3R        | 3                 | 80                  | -10.64                                       | -1.39                     | -15.23                                        | 4.47                    |
| 2/hMC4R        | 11                | 12                  | -8.27                                        | -1.52                     | -13.05                                        | 4.77                    |

<sup>a</sup> $\Delta G_{\text{bind}}$ : free energy of binding. <sup>b</sup>Energy terms contributing to the AutoDock4.2 scoring function. Electr: electrostatic; H-Bond: H-Bonding; VdW: Van der Waals; Des: desolvation; Tors: torsional entropy. All terms are given in kcal/mol.



Figure S1. a) RP-UHPLC trace of pure peptide 1.<sup>a</sup>

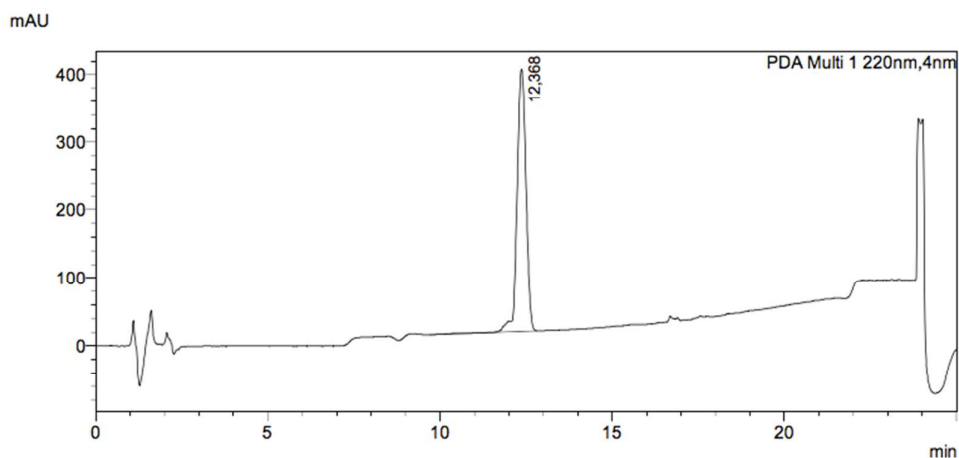

<sup>a</sup> UHPLC chromatogram of Ac-Nle-c[D-P-P-DPhe-R-W-K]-NH<sub>2</sub> (**1**) in a linear gradient of 10-90% of ACN in water containing 0.1% TFA over 15 min on a C18-bonded silica analytical column (Phenomenex Gemini 3 μm 110Å, 4.6x150 mm).

b) HRMS spectrum of peptide 1 (PG-989).

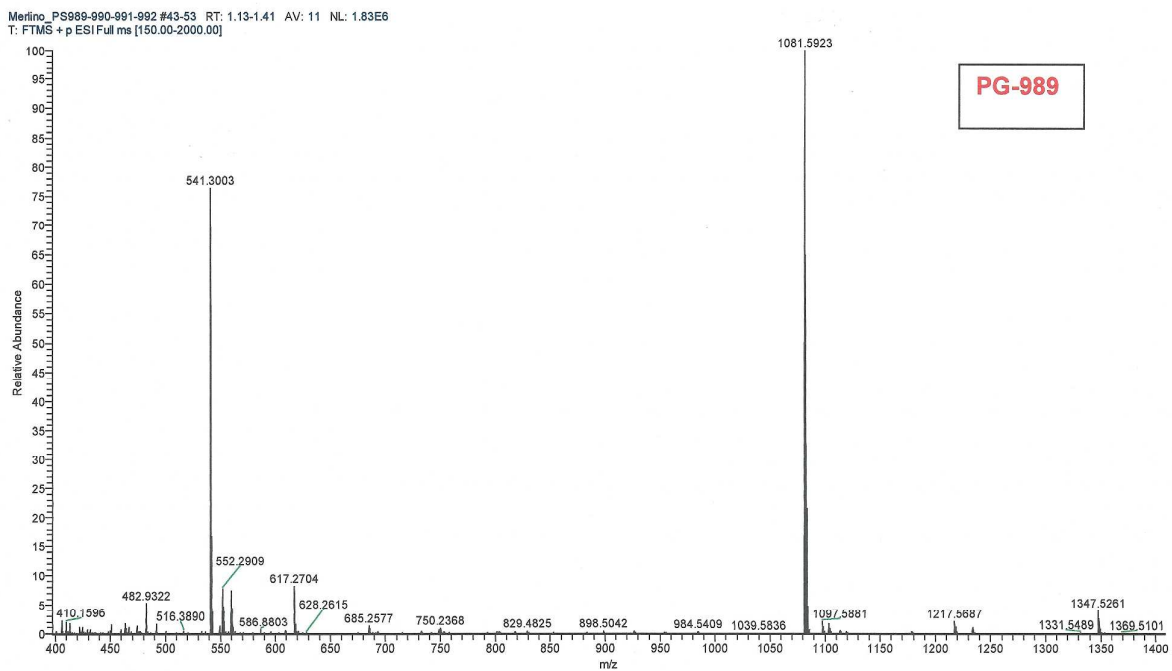

<sup>b</sup> Performed on Thermo Scientific mod LTQ Orbitrap XL.

**Figure S2. a)** RP-UHPLC trace of pure peptide **2**.<sup>a</sup>

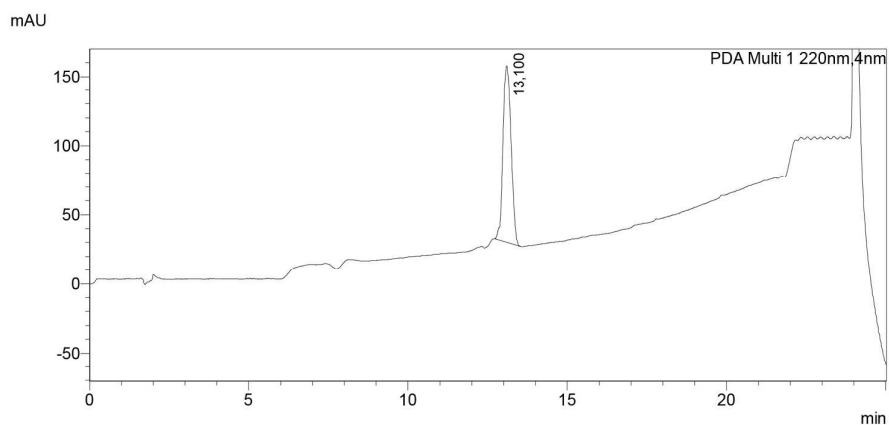

<sup>a</sup> UHPLC chromatogram of Ac-Nle-c[D-P-P-DNal(2')-R-W-K]-NH<sub>2</sub> (**2**) in a linear gradient of 10-90% of ACN in water containing 0.1% TFA over 15 min on a C18-bonded silica analytical column (Phenomenex Gemini 3 μm 110Å, 4.6x150 mm).

**b)** HRMS spectrum of peptide **2** (PG-990).

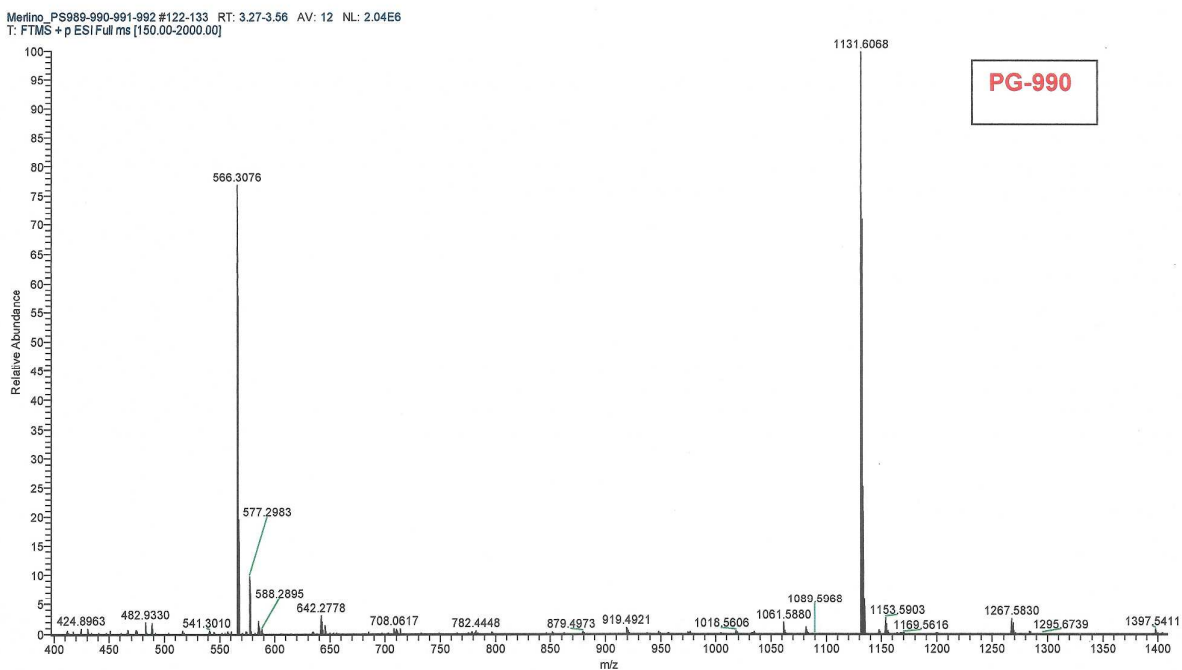

<sup>b</sup> Performed on Thermo Scientific mod LTQ Orbitrap XL.

**Figure S3. a)** RP-UHPLC trace of pure peptide **3**.<sup>a</sup>

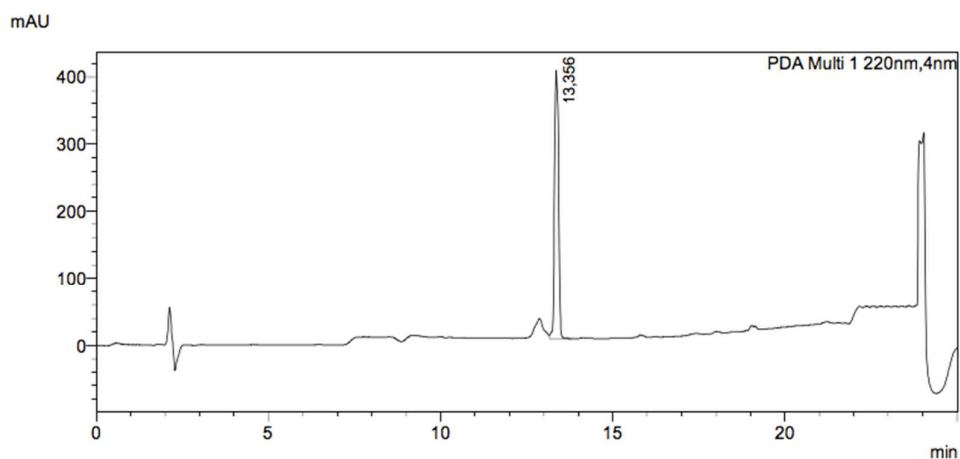

<sup>a</sup> UHPLC chromatogram of Ac-Nle-c[D-W-P-DPhe-R-W-K]-NH<sub>2</sub> (**3**) in a linear gradient of 10-90% of ACN in water containing 0.1% TFA over 15 min on a C18-bonded silica analytical column (Phenomenex Gemini 3 μm 110Å, 4.6x150 mm).

**b)** HRMS spectrum of peptide **3** (**PG-991**).

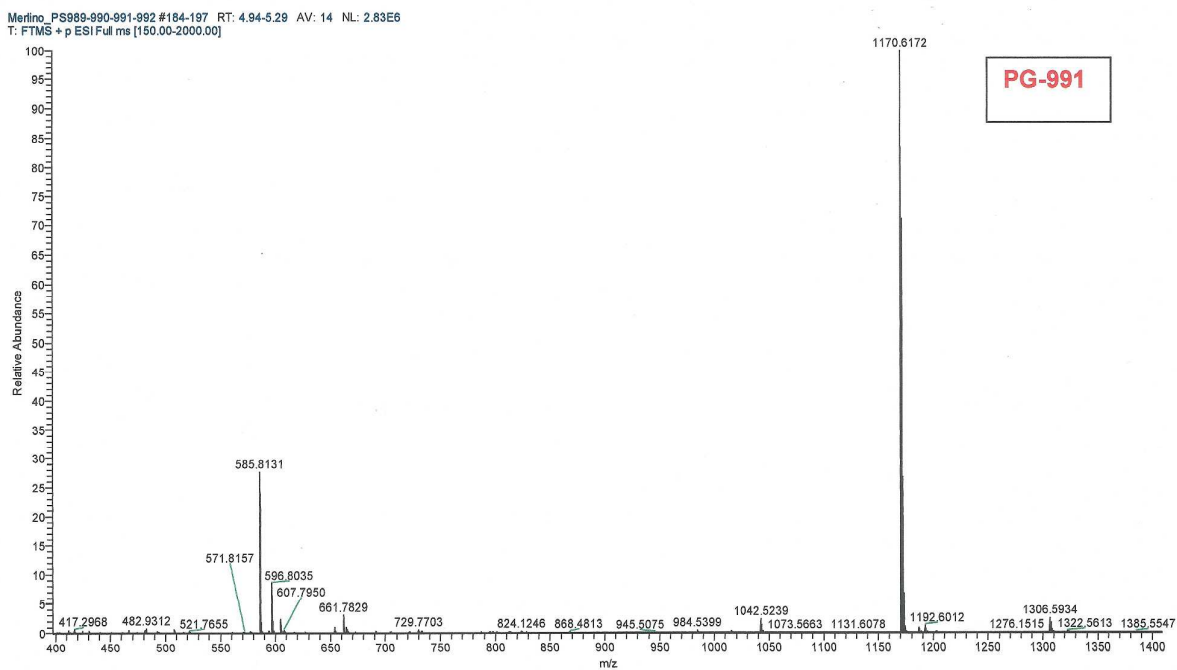

<sup>b</sup> Performed on Thermo Scientific mod LTQ Orbitrap XL.

**Figure S4.** a) RP-UHPLC trace of pure peptide **4**.<sup>a</sup>

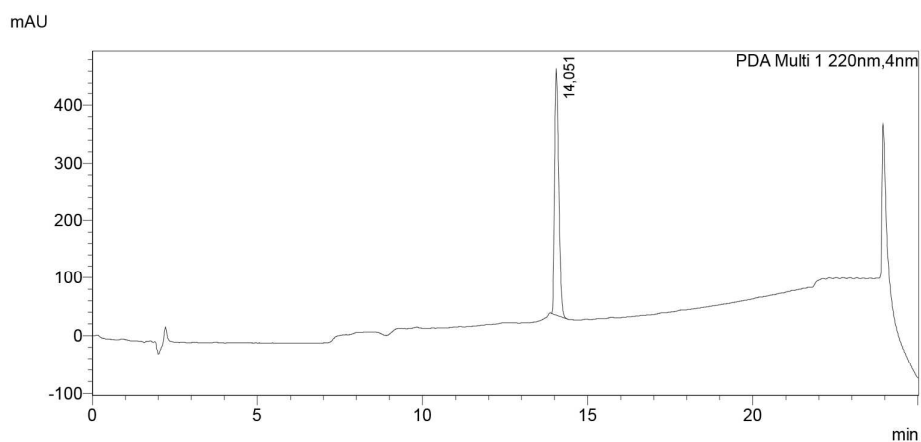

<sup>a</sup> UHPLC chromatogram of Ac-Nle-c[D-W-P-DNal(2')-R-W-K]-NH<sub>2</sub> (**4**) in a linear gradient of 10-90% of ACN in water containing 0.1% TFA over 15 min on a C18-bonded silica analytical column (Phenomenex Gemini 3 μm 110 Å, 4.6x150 mm).

b) HRMS spectrum of peptide **4** (**PG-992**).

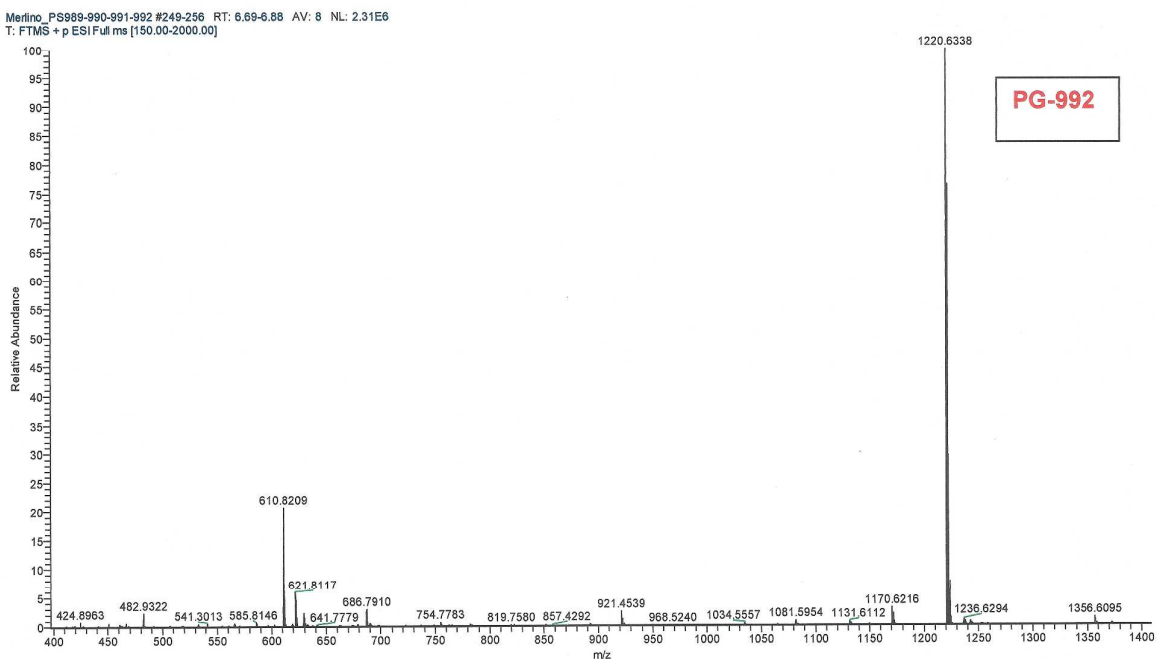

<sup>b</sup> Performed on Thermo Scientific mod LTQ Orbitrap XL.

**Figure S5.** Zoomed region of the NOESY spectrum of peptide **1**.<sup>a</sup>

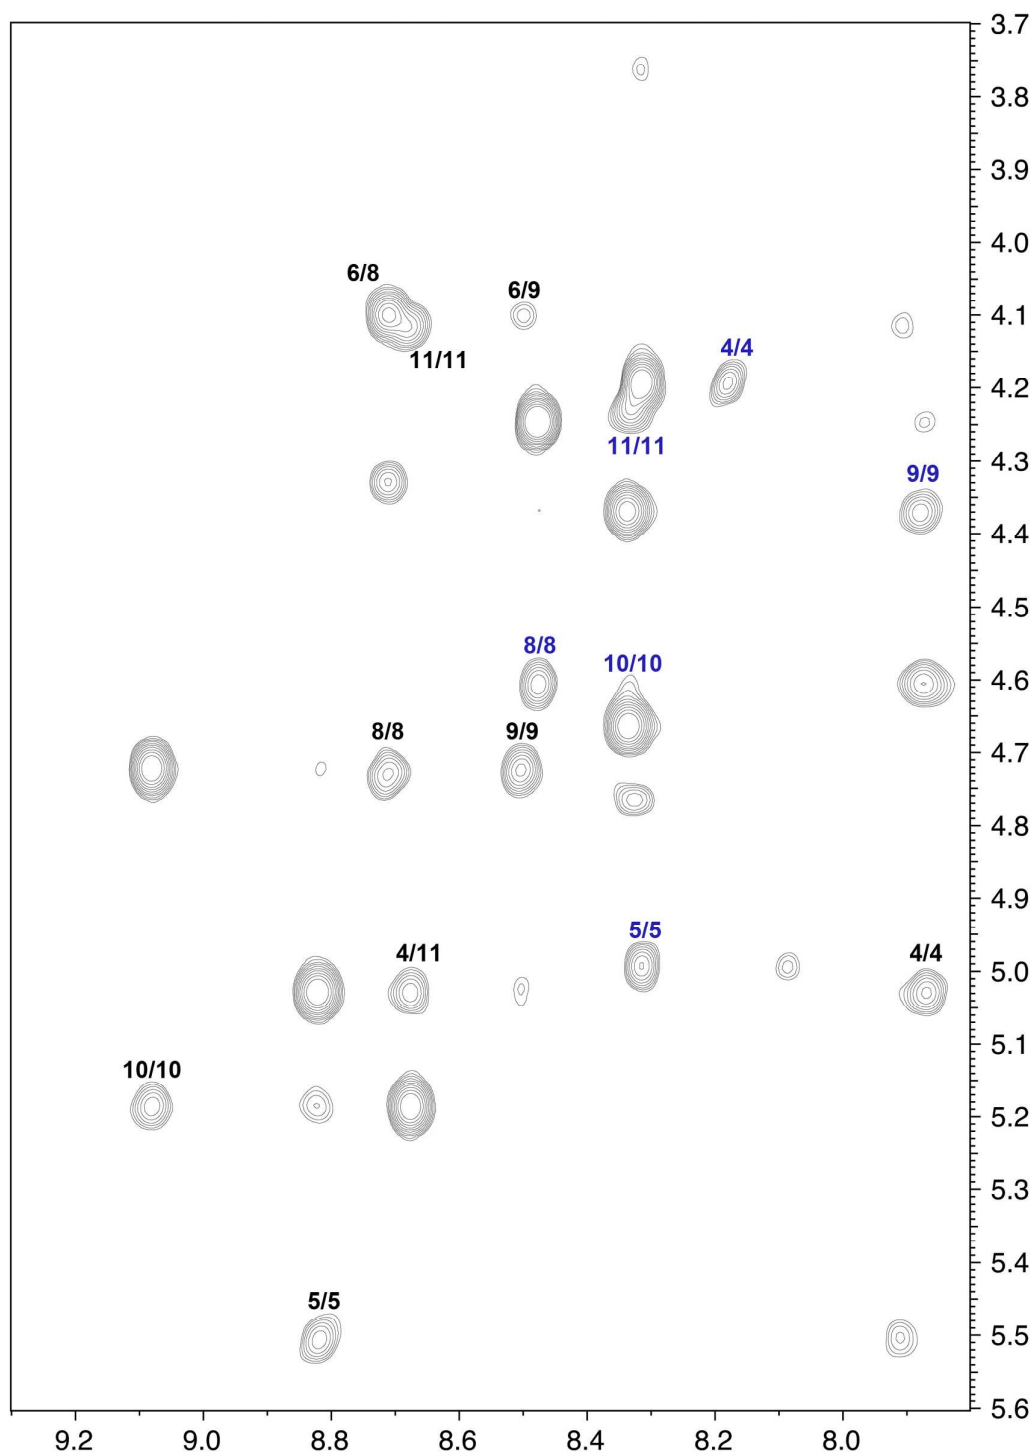

<sup>a</sup> Intraresidual and diagnostic H $\alpha$ -HN NOEs are labeled. Black: *trans-cis* state; blue: *trans-trans* state.

**Figure S6.** Zoomed region of the NOESY spectrum of peptide **2**.<sup>a</sup>

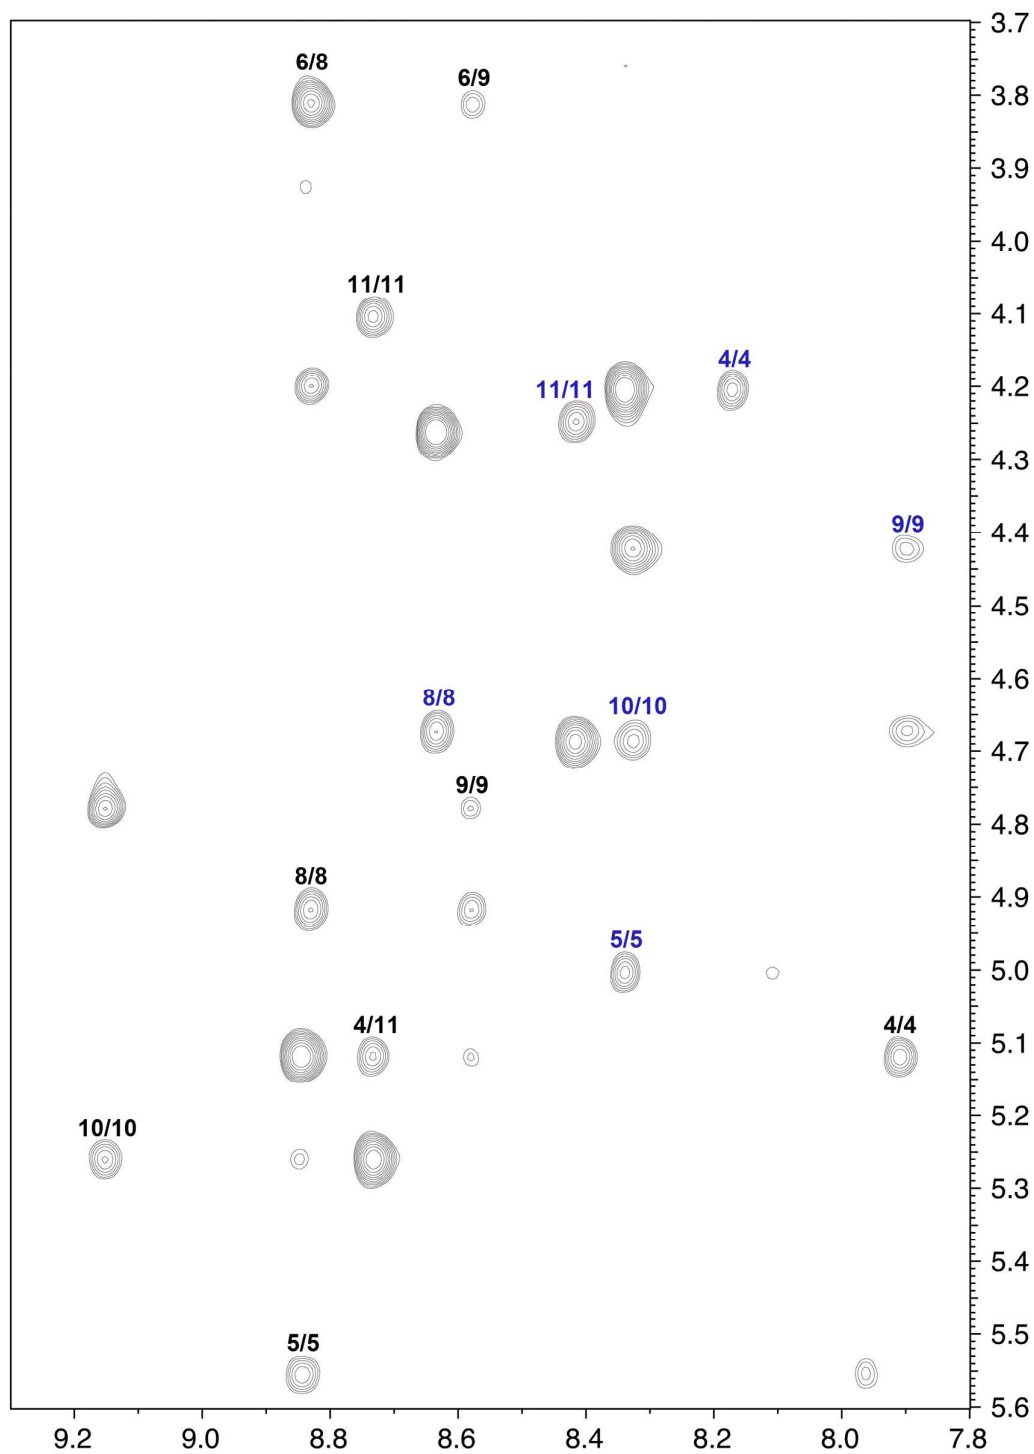

<sup>a</sup> Intraresidual and diagnostic H $\alpha$ -HN NOEs are labeled. Black: *trans-cis* state; blue: *trans-trans* state.

**Figure S7.** Zoomed region of the NOESY spectrum of peptide **4**.<sup>a</sup>

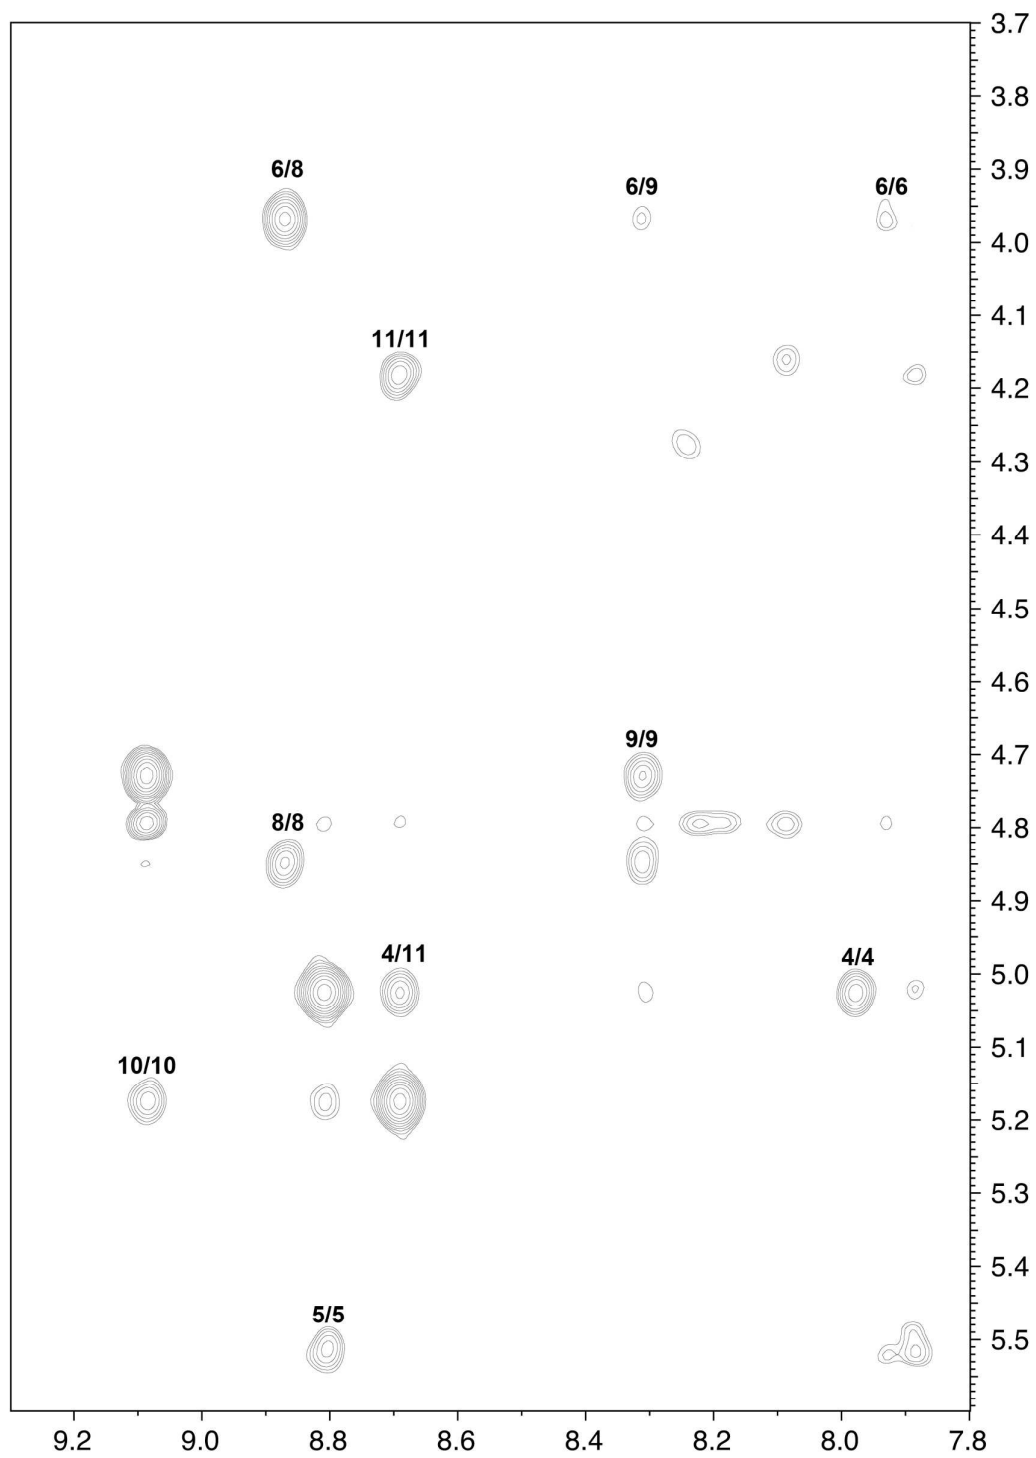

<sup>a</sup> Intraresidual and diagnostic H $\alpha$ -HN NOEs are labeled.

**Figure S8.** Secondary shifts of the  $\alpha$  protons of peptides 1, 2 and 4 in DPC solution.<sup>a</sup>

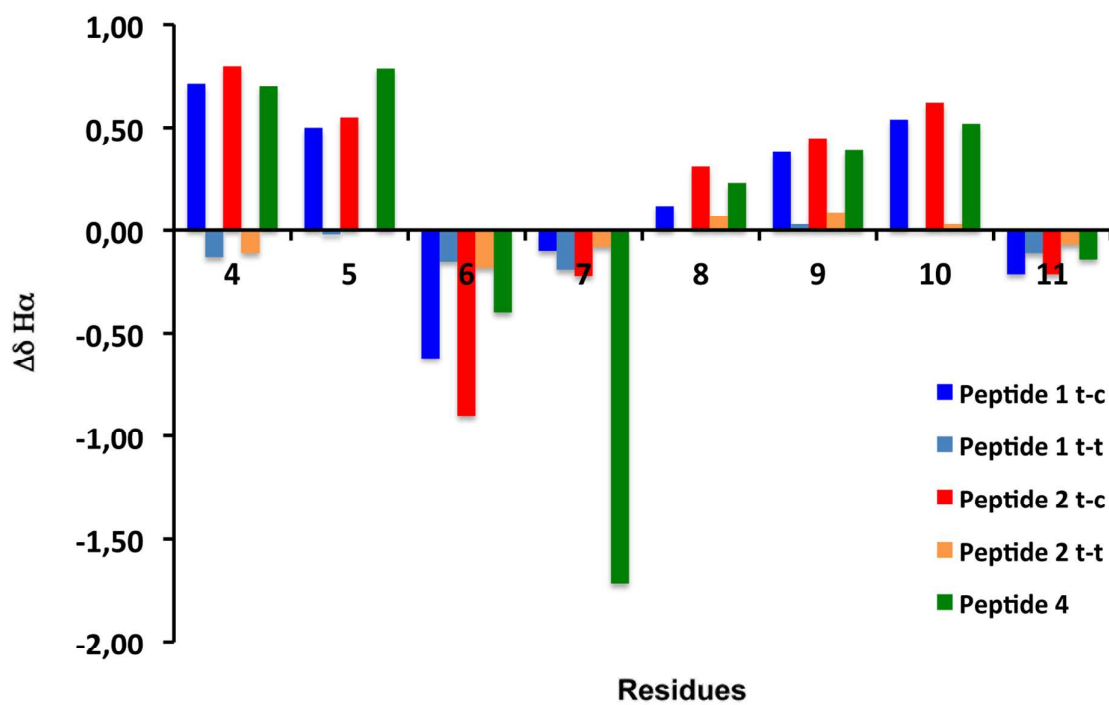

<sup>a</sup> t-c: *trans-cis* state; t-t: *trans-trans* state. Reference  $H_\alpha$  chemical shift values were taken from Andersen, N. H. et al. FEBS Lett. **1996**, 399, 47-52.
